# Supplementary material
Source: publisher figshare collection journal article supplement (https://acs.figshare.com/ndownloader/files/4731433)

## *Supporting Information*

### **1. Calculation concerning the oligomerization:**

This calculation has been applied to the equilibrium between dimer and tetramer, whatever the nature of the other oligomeric form, which does not interfere in the calculation. Here we have considered an hexamer.

The expression of the equilibrium constant for the dissociation of the tetramer,  $K_{\text{tet}}$ , as a function of the concentrations at equilibrium is:

$$K_{\text{tet}} = [D']^2 / ([T'] * C) \text{ where } C = 1 \text{ mol.L}^{-1} \quad (1)$$

$[D']$  and  $[T']$  represent the concentration of dimer and tetramer respectively.

$$C_0 = [D] + [T] + [H] \quad (2)$$

$[D]$ ,  $[T]$ ,  $[H]$  and  $C_0$  represent the concentration of dimer, tetramer and hexamer and the total protein concentration, respectively, all expressed in monomer unit, and linked to the concentrations of dimer and tetramer by:

$$[D'] = [D] / 2 \quad (3)$$

$$[T'] = [T] / 4 \quad (4)$$

Using equations (3) and (4), the expression of  $K_{\text{tet}}$  is now:

$$K_{\text{tet}} = ([D]/2)^2 / ([T]/4) \quad (5)$$

further simplified to:

$$K_{\text{tet}} = [D]^2 / [T] \quad (6)$$

The percentage of protein in each oligomeric form is:

$$\%T = [T] * 100 / C_0 \quad (7)$$

$$\%H = [H] * 100 / C_0 \quad (8)$$

$K_{tet}$  is expressed as a function of  $C_0$ ,  $[T]$  and  $[H]$ , by replacing  $[D]$  in (6) using equation (2):

$$K_{tet} = (C_0 - [T] - [H])^2 / [T] \quad (9)$$

Using the equations (7) and (8),  $[T]$  and  $[H]$  are replaced in equation (9) by expressing them as a function of  $C_0$ , %T and %H:

$$K_{tet} = 0.01 * C_0 * (100 - \%T - \%H)^2 / \%T \quad (10)$$

By applying the Log function to equation (10) we obtain equation (11):

$$\text{Log} ( \%T / (0.01 * (100 - \%T - \%H)^2) ) = \text{Log } C_0 - \text{Log } K_{tet} \quad (11)$$

Finally plotting of  $\text{Log} ( \%T / (0.01 * (100 - \%T - \%H)^2) )$  as a function of  $\text{Log } C_0$  yields a straight line with a slope equal to 1, intersecting the x-axis at  $\text{Log } C_0 = \text{Log } K_{tet}$ .

The values of % T and % H were determined by measuring the areas under each peak:

$$\%T = A2 * 100 / (A1 + A2 + A3) \text{ and}$$

$$\%H = A3 * 100 / (A1 + A2 + A3)$$

A1, A2 and A3 represent the areas under the peak of the dimer, tetramer and hexamer, respectively.

## 2. Supplementary tables and figure concerning the mass analysis

**Table 1S:** Cysteine alkylation pattern of Fur dimer and monomer.

Fur dimer (50  $\mu$ M) and monomer (50  $\mu$ M) in Tris/HCl 0.1 M (pH = 8), 0.1 M KCl, 50 mM EDTA, without and with DTT (200  $\mu$ M), were treated with iodoacetamide (6 mM) during 24h and analyzed by electrospray mass spectrometry. In the designation Fur\*+n, the star is for the N-terminal methionine excised form of Fur and n for the number of alkyl groups covalently linked.

|                 | Dimer               |                 | Monomer             |                 |
|-----------------|---------------------|-----------------|---------------------|-----------------|
|                 | Mass ( $\pm$ 3 Da ) | Designation     | Mass ( $\pm$ 3 Da ) | Designation     |
| + EDTA          | 16891<br>17022      | Fur*+4<br>Fur+4 | 16660<br>16791      | Fur*<br>Fur     |
| + EDTA<br>+ DTT | 16891<br>17022      | Fur*+4<br>Fur+4 | 16891<br>17022      | Fur*+4<br>Fur+4 |

**Table 2S:** Peptide map of endoproteinase Lys-C digested monomer.

Fur monomer (25  $\mu$ M) in 100 mM ammonium bicarbonate (pH = 7.9), without and with DTT (200  $\mu$ M), was digested with endoproteinase Lys-C and the crude peptides were analyzed by MALDI-TOF mass spectrometry.

| number | Fragments | Expected | Measured<br>- DTT | Measured<br>+ DTT |
|--------|-----------|----------|-------------------|-------------------|
| 1      | 99 – 117  | 2177.1   | 2177.1            | 2177.1            |
| 2      | 22 – 41   | 2349.2   | 2349.3            | 2349.2            |
| 3      | 78 – 98   | 2460.2   | <b>2458.3</b>     | <b>2460.2</b>     |
| 4      | 118 – 148 | 3547.6   | <b>3545.7</b>     | <b>3547.7</b>     |
| 5      | 42 - 77   | 4034.1   | 4034.0            | 4034.1            |

**Figure S1.** DMA crosslink experiments

(**A, B**) The dimer was treated with DMA and the non-linked monomer (**upper spectrum**) and covalently cross-linked dimer (**lower spectrum**) were purified by HPLC and digested with endoproteinase Glu-C. The resulting peptides were separated by HPLC and each fraction was analyzed by MALDI-TOF mass spectrometry. The figures shows the spectrum of the two HPLC fractions in which peptide (T1-E23) was eluted (**A, B**). The spectrum of the fractions containing peptide T1-E23, gives a singly charged ion at  $m/z$  2538 (**A**) corresponding to the intact peptide or  $m/z$  2648 (**B**) that is due to internal DMA crosslink. The 126 Da mass adducts correspond to fixation of one DMA molecule on one or several of the four lysines of the peptide or on the N-terminal amino group. In the case of the covalent dimer (**lower spectra**), new species are detected with  $m/z$  3368 (**A**) and  $m/z$  4988 (**B**). (**C**) HPLC profil of DMA treated  $Zn_1Fur_D$  (**upper profil**) and  $Zn_1Mn_2Fur_D$  (**lower profil**).

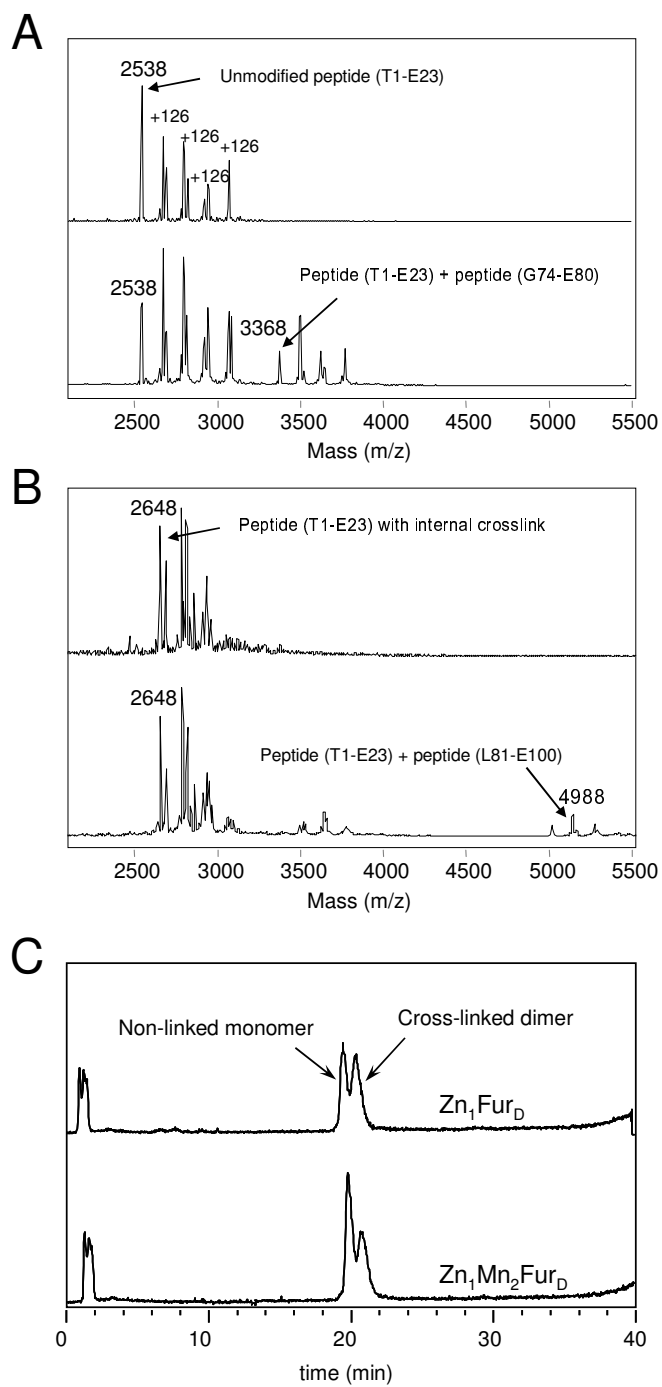

Supplement: Supplementary file 1 [file 4731433]
